# Supplementary material for: IQGAP1 is a key node within the small GTPase network
Source: PubMed Central journal article supplement (PMC4011815; doi:10.4161/sgtp.27451), 2013-12-19
Supplement: sgtp-4-199-s01.pdf [file sgtp-4-199-s01.pdf]

## **Supplemental Material to:**

**Guillaume Jacquemet and Martin J Humphries**

**IQGAP1 is a key node within the small GTPase network**

**Small GTPases 2013; 4(4)**

**<http://dx.doi.org/10.4161/sgtp.27451>**

**[http://www.landesbioscience.com/journals/smallgtpases/  
article/27451](http://www.landesbioscience.com/journals/smallgtpases/article/27451)**

Sheet1

| Uniprot ID | Gene Name | Stress  | small GTPase |
|------------|-----------|---------|--------------|
| P0CG48     | UBC       | 5278432 |              |
| P63000     | RAC1      | 460586  | yes          |
| P60953     | CDC42     | 413700  | yes          |
| P62993     | GRB2      | 384118  |              |
| Q15717     | ELAVL1    | 380650  |              |
| P63104     | YWHAZ     | 334616  |              |
| P61586     | RHOA      | 294128  | yes          |
| P01112     | HRAS      | 285024  | yes          |
| P12931     | SRC       | 248074  |              |
| P62330     | ARF6      | 221198  | yes          |
| Q13618     | CUL3      | 181456  |              |
| P04637     | p53       | 174526  |              |
| P00533     | EGFR      | 171832  |              |
| Q9Y4K3     | TRAF6     | 169270  |              |
| P40337     | VHL       | 146196  |              |
| P61956     | SUMO2     | 145712  |              |
| P01106     | MYC       | 141474  |              |
| P20338     | RAB4A     | 134056  | yes          |
| P27986     | PIK3R1    | 133558  |              |
| P61981     | YWHAG     | 125702  |              |
| Q9Y6K9     | IKBKG     | 117600  |              |
| P62158     | CALM1     | 115724  |              |
| P04049     | RAF1      | 104594  |              |
| P62834     | RAP1A     | 99222   | yes          |
| Q15796     | SMAD2     | 98832   |              |
| P17252     | PRKCA     | 96880   |              |
| P68400     | CSNK2A1   | 96310   |              |
| Q00987     | MDM2      | 95036   |              |
| P20339     | RAB5A     | 93092   | yes          |
| Q13485     | SMAD4     | 92748   |              |
| P84077     | ARF1      | 91868   | yes          |
| P51159     | RAB27A    | 91638   | yes          |
| Q15004     | KIAA0101  | 89976   |              |
| Q14164     | IKBKE     | 89544   |              |
| P62826     | RAN       | 87802   | yes          |
| Q09472     | EP300     | 85588   |              |
| Q04917     | YWHAH     | 85234   |              |
| P32121     | ARRB2     | 84094   |              |
| P63165     | SUMO1     | 83626   |              |
| P36897     | TGFBR1    | 82994   |              |
| Q12933     | TRAF2     | 80114   |              |
| P08670     | VIM       | 79226   |              |
| P27348     | YWHAQ     | 77138   |              |
| P60709     | ACTB      | 76862   |              |
| P84022     | SMAD3     | 76682   |              |
| P21333     | FLNA      | 73850   |              |
| P62820     | RAB1A     | 72580   | yes          |
| P04183     | TK1       | 71488   |              |
| Q92905     | COPS5     | 71432   |              |
| P10114     | RAP2A     | 70506   | yes          |

Sheet1

|        |        |       |     |
|--------|--------|-------|-----|
| Q13153 | PAK1   | 70142 |     |
| P35222 | CTNNB1 | 70142 |     |
| Q13526 | PIN1   | 69398 |     |
| P17612 | PRKACA | 67494 |     |
| Q9UI14 | RABAC1 | 67068 |     |
| Q93034 | CUL5   | 66354 |     |
| P19174 | PLCG1  | 66118 |     |
| Q13547 | HDAC1  | 65962 |     |
| P31946 | YWHAB  | 65754 |     |
| P62491 | RAB11A | 64856 | yes |
| P31749 | AKT1   | 63934 |     |
| P07910 | HNRNPC | 63534 |     |
| P06241 | FYN    | 62566 |     |
| P61224 | RAP1B  | 61356 | yes |
| P55040 | GEM    | 61148 | yes |
| Q15858 | SCN9A  | 60356 |     |
| Q00610 | CLTC   | 59152 |     |
| P00519 | ABL1   | 58702 |     |
| P63279 | UBE2I  | 58444 |     |
| P51149 | RAB7A  | 57482 | yes |
| Q16637 | SMN1   | 56958 |     |
| P20340 | RAB6A  | 56628 | yes |
| Q05397 | PTK2   | 56400 |     |
| P42574 | CASP3  | 56390 |     |
| P11233 | RALA   | 55688 | yes |
| P49407 | ARRB1  | 55332 |     |
| P40763 | STAT3  | 55328 |     |
| Q15811 | ITSN1  | 54680 |     |
| P15311 | VIL2   | 54112 |     |
| Q13616 | CUL1   | 52602 |     |
| P10301 | RRAS   | 52298 | yes |
| Q9Y265 | RUVBL1 | 51968 |     |
| Q05513 | PRKCZ  | 51292 |     |
| P46108 | CRK    | 50272 |     |
| P26641 | EEF1G  | 50156 |     |
| P63167 | DYNLL1 | 49870 |     |
| Q9NRC8 | SIRT7  | 49452 |     |
| P41743 | PRKCI  | 49396 |     |
| P11274 | BCR    | 49008 |     |
| P62258 | YWHAE  | 48770 |     |
| P61026 | RAB10  | 48138 | yes |
| Q9HCE7 | SMURF1 | 47900 |     |
| P22681 | CBL    | 47094 |     |
| O15162 | PLSCR1 | 46780 |     |
| P46940 | IQGAP1 | 46570 |     |
| P03372 | ESR1   | 46304 |     |
| P30480 | HLA-B  | 46054 |     |
| P27361 | MAPK3  | 46020 |     |
| P49703 | ARL4D  | 45772 | yes |
| P06493 | CDK1   | 44666 |     |
| Q01105 | SET    | 44628 |     |
| P08107 | HSPA1A | 43944 |     |
| P16333 | NCK1   | 43500 |     |

Sheet1

|        |           |       |     |
|--------|-----------|-------|-----|
| P48023 | FASLG     | 43452 |     |
| P07355 | ANXA2     | 43322 |     |
| Q15286 | RAB35     | 43064 | yes |
| Q96PM5 | RCHY1     | 42680 |     |
| P06702 | S100A9    | 41996 |     |
| P62070 | RRAS2     | 40924 | yes |
| P63244 | GNB2L1    | 40390 |     |
| P60763 | RAC3      | 40258 | yes |
| Q86UR5 | RIMS1     | 39818 |     |
| P31947 | SFN       | 39490 |     |
| Q96B97 | SH3KBP1   | 39368 |     |
| P60520 | GABARAPL2 | 39138 |     |
| Q92769 | HDAC2     | 38900 |     |
| Q9HAU4 | SMURF2    | 38814 |     |
| Q9Y230 | RUVBL2    | 38530 |     |
| Q8TAI7 | RHEBL1    | 38178 | yes |
| P23508 | MCC       | 37908 |     |
| P52292 | KPNA2     | 37590 |     |
| P36406 | TRIM23    | 37588 | yes |
| P11171 | EPB41     | 37246 |     |
| Q15843 | NEDD8     | 37160 |     |
| Q13177 | PAK2      | 36838 |     |
| P61019 | RAB2A     | 36266 | yes |
| Q9P0S9 | TMEM14C   | 36032 |     |
| P30153 | PPP2R1A   | 35990 |     |
| P20337 | RAB3B     | 35906 | yes |
| P54253 | ATXN1     | 35644 |     |
| P55042 | RRAD      | 35564 | yes |
| Q03135 | CAV1      | 35340 |     |
| P45983 | MAPK8     | 35274 |     |
| Q01844 | EWSR1     | 35252 |     |
| Q96PU5 | NEDD4L    | 35226 |     |
| Q92993 | KAT5      | 35168 |     |
| P49023 | PXN       | 34486 |     |
| P61006 | RAB8A     | 34360 | yes |
| P04150 | NR3C1     | 34306 |     |
| O00212 | RHOD      | 34178 | yes |
| P05556 | ITGB1     | 33450 |     |
| O14641 | DVL2      | 33348 |     |
| P25445 | FAS       | 33342 |     |
| Q8TBB1 | LNX1      | 32172 |     |
| Q9Y478 | PRKAB1    | 32006 |     |
| Q9UQL6 | HDAC5     | 31932 |     |
| Q05655 | PRKCD     | 31884 |     |
| P20936 | RASA1     | 31654 |     |
| Q9UQ26 | RIMS2     | 31594 |     |
| Q99558 | MAP3K14   | 31480 |     |
| Q04695 | KRT17     | 31264 |     |
| P46934 | NEDD4     | 31156 |     |
| Q9H0U4 | RAB1B     | 30932 | yes |
| Q96GG9 | DCUN1D1   | 30170 |     |
| O14818 | PSMA7     | 30104 |     |
| Q5T3J3 | LRIF1     | 30042 |     |

Sheet1

|        |          |       |     |
|--------|----------|-------|-----|
| P01111 | NRAS     | 29436 | yes |
| P61077 | UBE2D3   | 29144 |     |
| Q7L5N1 | COPS6    | 29104 |     |
| P05109 | S100A8   | 28846 |     |
| O15085 | ARHGEF11 | 28718 |     |
| Q9NQC3 | RTN4     | 28690 |     |
| Q9H0T7 | RAB17    | 28496 | yes |
| Q92947 | GCDH     | 28452 |     |
| P12956 | XRCC6    | 28434 |     |
| P68366 | TUBA4A   | 28320 |     |
| Q07889 | SOS1     | 28122 |     |
| P15498 | VAV1     | 28074 |     |
| P25963 | NFKBIA   | 27992 |     |
| P57735 | RAB25    | 27162 | yes |
| P42336 | PIK3CA   | 26998 |     |
| O00238 | BMPR1B   | 26628 |     |
| O43924 | PDE6D    | 26248 |     |
| P68133 | ACTA1    | 26054 |     |
| Q96S21 | RAB40C   | 26028 | yes |
| O95376 | ARIH2    | 25928 |     |
| Q6IPS9 | EEF1A1   | 25730 |     |
| Q99816 | TSG101   | 25718 |     |
| P62873 | GNB1     | 25624 |     |
| P06748 | NPM1     | 25356 |     |
| Q13393 | PLD1     | 25316 |     |
| Q14203 | DCTN1    | 25280 |     |
| Q15382 | RHEB     | 24688 | yes |
| Q9NRR5 | UBQLN4   | 24482 |     |
| P06239 | LCK      | 24458 |     |
| Q92963 | RIT1     | 24310 | yes |
| Q9UGL1 | KDM5B    | 24060 |     |
| Q9Y3P9 | RABGAP1  | 24024 |     |
| Q9BU20 | RSG1     | 23994 | yes |
| P40692 | MLH1     | 23994 |     |
| P43487 | RANBP1   | 23650 |     |
| Q9BVJ6 | UTP14A   | 23236 |     |
| P02792 | FTL      | 23128 |     |
| P67775 | PPP2CA   | 23058 |     |
| P00491 | PNP      | 22846 |     |
| Q5R372 | RABGAP1L | 22580 |     |
| Q99750 | MDF1     | 22580 |     |
| Q13310 | PABPC4   | 22484 |     |
| Q13263 | TRIM28   | 22444 |     |
| P10275 | AR       | 22440 |     |
| P62745 | RHOB     | 22434 | yes |
| O15151 | MDM4     | 22354 |     |
| P49815 | TSC2     | 22344 |     |
| P56945 | BCAR1    | 22060 |     |
| P51116 | FXR2     | 21976 |     |
| P31150 | GDI1     | 21072 |     |
| O43150 | DDEF2    | 21036 |     |
| O14939 | PLD2     | 20880 |     |
| P25786 | PSMA1    | 20768 |     |

Sheet1

|        |          |       |     |
|--------|----------|-------|-----|
| Q14974 | KPNB1    | 20668 |     |
| Q16891 | IMMT     | 20540 |     |
| P51617 | IRAK1    | 20526 |     |
| O60739 | EIF1B    | 20500 |     |
| Q9H0F7 | ARL6     | 20318 | yes |
| O14964 | HGS      | 20276 |     |
| Q9H8T0 | AKTIP    | 20262 |     |
| P52565 | ARHGDI3  | 20174 |     |
| P14373 | TRIM27   | 20060 |     |
| Q02750 | MAP2K1   | 20020 |     |
| P15153 | RAC2     | 19962 | yes |
| P18754 | RCC1     | 19908 |     |
| P42768 | WAS      | 19836 |     |
| Q70SY1 | CREB3L2  | 19834 |     |
| Q13233 | MAP3K1   | 19830 |     |
| Q08379 | GOLGA2   | 19786 |     |
| Q9BZG1 | RAB34    | 19754 | yes |
| Q15797 | SMAD1    | 19716 |     |
| P61106 | RAB14    | 19418 | yes |
| P14618 | PKM      | 19342 |     |
| P50395 | GDI2     | 19320 |     |
| Q9H0H5 | RACGAP1  | 19282 |     |
| Q9BSI4 | TINF2    | 19248 |     |
| Q71U36 | TUBA1A   | 19242 |     |
| P49768 | PSEN1    | 19094 |     |
| Q9NXU5 | ARL15    | 19038 | yes |
| O15350 | TP73     | 19026 |     |
| P42224 | STAT1    | 18950 |     |
| P51532 | SMARCA4  | 18802 |     |
| Q9Y2H9 | MAST1    | 18766 |     |
| P19438 | TNFRSF1A | 18748 |     |
| P25205 | MCM3     | 18666 |     |
| Q9UKE5 | TNIK     | 18648 |     |
| P35240 | NF2      | 18578 |     |
| P20336 | RAB3A    | 18392 | yes |
| P51148 | RAB5C    | 18354 | yes |
| P54259 | ATN1     | 18326 |     |
| P11234 | RALB     | 18300 | yes |
| Q13114 | TRAF3    | 18268 |     |
| O43639 | NCK2     | 18234 |     |
| P23246 | SFPQ     | 18186 |     |
| P05771 | PRKCB    | 18134 |     |
| P78559 | MAP1A    | 17892 |     |
| P68104 | EEF1A1   | 17818 |     |
| P36405 | ARL3     | 17754 | yes |
| Q9Y2J0 | RPH3A    | 17532 |     |
| Q14204 | DYNC1H1  | 17526 |     |
| O14980 | XPO1     | 17470 |     |
| Q9ULH1 | DDEF1    | 17240 |     |
| Q9HB71 | CACYBP   | 17190 |     |
| P18206 | VCL      | 17160 |     |
| P10415 | BCL2     | 17150 |     |
| Q15907 | RAB11B   | 17046 | yes |

Sheet1

|        |          |       |     |
|--------|----------|-------|-----|
| P18031 | PTPN1    | 16840 |     |
| O00459 | PIK3R2   | 16812 |     |
| P16104 | H2AFX    | 16730 |     |
| Q5UIP0 | RIF1     | 16684 |     |
| P07737 | PFN1     | 16640 |     |
| P04406 | GAPDH    | 16542 |     |
| Q969H4 | CNKSR1   | 16498 |     |
| P61587 | RND3     | 16442 | yes |
| Q13432 | UNC119   | 16392 |     |
| O15211 | RGL2     | 16328 |     |
| Q13347 | EIF3I    | 16136 |     |
| P40616 | ARL1     | 16030 | yes |
| Q13137 | CALCOCO2 | 15990 |     |
| P17081 | RHOQ     | 15860 | yes |
| Q08211 | DHX9     | 15810 |     |
| P04629 | NTRK1    | 15790 |     |
| P21980 | TGM2     | 15742 |     |
| P52272 | HNRNPM   | 15728 |     |
| P35579 | MYH9     | 15622 |     |
| Q05516 | ZBTB16   | 15574 |     |
| Q9H0E2 | TOLLIP   | 15414 |     |
| Q15276 | RABEP1   | 15364 |     |
| P29475 | NOS1     | 15230 |     |
| P06213 | INSR     | 14912 |     |
| Q9H2M9 | RAB3GAP2 | 14692 |     |
| P46379 | BAG6     | 14684 |     |
| P28340 | POLD1    | 14646 |     |
| Q14289 | PTK2B    | 14632 |     |
| P61020 | RAB5B    | 14438 | yes |
| Q9ULW5 | RAB26    | 14406 | yes |
| P12268 | IMPDH2   | 14252 |     |
| Q9UKG1 | APPL1    | 14166 |     |
| P50502 | ST13     | 14048 |     |
| P30304 | CDC25A   | 14036 |     |
| P42345 | MTOR     | 14026 |     |
| P10276 | RARA     | 13896 |     |
| O60216 | RAD21    | 13890 |     |
| P04179 | SOD2     | 13746 |     |
| Q92831 | KAT2B    | 13682 |     |
| P51153 | RAB13    | 13640 | yes |
| Q07157 | TJP1     | 13610 |     |
| P55210 | CASP7    | 13400 |     |
| Q16658 | FSCN1    | 13344 |     |
| Q16659 | MAPK6    | 13330 |     |
| Q9NS23 | RASSF1   | 13288 |     |
| Q14697 | GANAB    | 13288 |     |
| P27695 | APEX1    | 13278 |     |
| O95477 | ABCA1    | 13266 |     |
| O14807 | MRAS     | 13160 | yes |
| P05129 | PRKCG    | 13134 |     |
| P55786 | NPEPPS   | 13114 |     |
| Q15052 | ARHGEF6  | 13110 |     |
| Q9NR12 | PDLIM7   | 13050 |     |

Sheet1

|        |          |       |     |
|--------|----------|-------|-----|
| P55209 | NAP1L1   | 13000 |     |
| P98170 | XIAP     | 12896 |     |
| P49792 | RANBP2   | 12876 |     |
| P05161 | ISG15    | 12818 |     |
| P46527 | CDKN1B   | 12770 |     |
| P19338 | NCL      | 12750 |     |
| P05783 | KRT18    | 12726 |     |
| P52306 | RAP1GDS1 | 12666 |     |
| O00329 | PIK3CD   | 12628 |     |
| P15056 | BRAF     | 12524 |     |
| P19793 | RXRA     | 12370 |     |
| P04844 | RPN2     | 12362 |     |
| O94955 | RHOBTB3  | 12312 |     |
| P60228 | EIF3E    | 12284 |     |
| Q9UBF6 | RNF7     | 12256 |     |
| Q9BWF2 | TRAIP    | 12228 |     |
| Q9Y678 | COPG1    | 12014 |     |
| Q13671 | RIN1     | 11938 |     |
| P08134 | RHOC     | 11906 | yes |
| P01023 | A2M      | 11870 |     |
| Q15370 | TCEB2    | 11786 |     |
| P28074 | PSMB5    | 11778 |     |
| O15399 | GRIN2D   | 11754 |     |
| P00505 | GOT2     | 11736 |     |
| Q13885 | TUBB2A   | 11730 |     |
| O95257 | GADD45G  | 11728 |     |
| Q99578 | RIT2     | 11680 | yes |
| O14936 | CASK     | 11332 |     |
| P61225 | RAP2B    | 11186 | yes |
| Q9UJ41 | RABGEF1  | 11040 |     |
| P21912 | SDHB     | 10984 |     |
| P55196 | MLLT4    | 10976 |     |
| Q07912 | TNK2     | 10894 |     |
| O60828 | PQBP1    | 10870 |     |
| P07437 | TUBB     | 10750 |     |
| Q8IUC4 | RHPN2    | 10722 |     |
| P41220 | RGS2     | 10692 |     |
| Q9Y5M8 | SRPRB    | 10672 |     |
| P11586 | MTHFD1   | 10656 |     |
| Q9NSC2 | SALL1    | 10650 |     |
| Q99418 | CYTH2    | 10622 |     |
| Q15438 | CYTH1    | 10498 |     |
| Q9P258 | RCC2     | 10438 |     |
| Q9Y5K6 | CD2AP    | 10376 |     |
| Q16513 | PKN2     | 10360 |     |
| Q13129 | RLF      | 10344 |     |
| Q9NRY4 | ARHGAP35 | 10284 |     |
| P49810 | PSEN2    | 10176 |     |
| Q9Y2Q3 | GSTK1    | 10154 |     |
| P12830 | CDH1     | 10140 |     |
| Q9BV36 | MLPH     | 10130 |     |
| P62256 | UBE2H    | 10094 |     |
| P53611 | RABGGTB  | 10078 |     |



Sheet1

|        |          |      |     |
|--------|----------|------|-----|
| P63096 | GNAI1    | 9952 |     |
| Q9UNE2 | RPH3AL   | 9946 |     |
| Q9P2H0 | KIAA1377 | 9886 |     |
| Q93062 | RBPMS    | 9884 |     |
| Q92930 | RAB8B    | 9844 | yes |
| Q9NRD5 | PICK1    | 9784 |     |
| Q9Y2Y0 | ARL2BP   | 9704 |     |
| Q15645 | TRIP13   | 9690 |     |
| O00471 | EXOC5    | 9668 |     |
| Q96L34 | MARK4    | 9580 |     |
| P47224 | RABIF    | 9574 |     |
| Q96EV8 | DTNBP1   | 9566 |     |
| P24385 | CCND1    | 9546 |     |
| Q13315 | ATM      | 9498 |     |
| Q9Y547 | HSPB11   | 9466 |     |
| Q96EY1 | DNAJA3   | 9456 |     |
| Q8IYI6 | EXOC8    | 9424 |     |
| Q96RU3 | FNBP1    | 9356 |     |
| P26038 | MSN      | 9284 |     |
| P49790 | NUP153   | 9272 |     |
| P47736 | RAP1GAP  | 9116 |     |
| P51151 | RAB9A    | 9108 | yes |
| O75533 | SF3B1    | 9042 |     |
| B0QYK1 | EWSR1    | 9034 |     |
| P49354 | FNTA     | 9030 |     |
| Q15369 | TCEB1    | 9020 |     |
| Q02641 | CACNB1   | 9020 |     |
| Q13490 | BIRC2    | 9008 |     |
| Q9Y2X7 | GIT1     | 8886 |     |
| Q96LR5 | UBE2E2   | 8804 |     |
| Q9HAV4 | XPO5     | 8780 |     |
| O00299 | CLIC1    | 8776 |     |
| P01116 | KRAS     | 8740 | yes |
| O95989 | NUDT3    | 8690 |     |
| P10398 | ARAF     | 8684 |     |
| P33176 | KIF5B    | 8650 |     |
| Q96GM8 | TOE1     | 8538 |     |
| P53618 | COPB1    | 8532 |     |
| Q9NZN5 | ARHGEF12 | 8512 |     |
| P14598 | NCF1     | 8512 |     |
| Q92922 | SMARCC1  | 8506 |     |
| P56537 | EIF6     | 8490 |     |
| Q12967 | RALGDS   | 8322 |     |
| Q07960 | ARHGAP1  | 8304 |     |
| Q92558 | WASF1    | 8272 |     |
| P52735 | VAV2     | 8272 |     |
| P58107 | EPPK1    | 8260 |     |
| O43187 | IRAK2    | 8256 |     |
| Q01968 | OCRL     | 8192 |     |
| Q9NZ52 | GGA3     | 8174 |     |
| Q8NFJ9 | BBS1     | 8166 |     |
| Q00005 | PPP2R2B  | 8124 |     |
| Q9UKW4 | VAV3     | 8080 |     |

Sheet1

|        |         |      |     |
|--------|---------|------|-----|
| P23443 | RPS6KB1 | 8068 |     |
| Q8TAQ2 | SMARCC2 | 8060 |     |
| O14924 | RGS12   | 8044 |     |
| O95782 | AP2A1   | 8044 |     |
| P31689 | DNAJA1  | 8004 |     |
| O43157 | PLXNB1  | 7866 |     |
| Q9Y266 | NUDC    | 7846 |     |
| Q9GZV4 | EIF5A2  | 7826 |     |
| Q04771 | ACVR1   | 7818 |     |
| P38936 | CDKN1A  | 7720 |     |
| Q7Z6J0 | SH3RF1  | 7718 |     |
| P35520 | CBS     | 7706 |     |
| Q9Y6R4 | MAP3K4  | 7698 |     |
| Q13332 | PTPRS   | 7686 |     |
| P22392 | NME2    | 7672 |     |
| P19525 | EIF2AK2 | 7634 |     |
| P07711 | CTSL1   | 7614 |     |
| Q13009 | TIAM1   | 7594 |     |
| P30307 | CDC25C  | 7582 |     |
| Q13555 | CAMK2G  | 7560 |     |
| Q14155 | ARHGEF7 | 7522 |     |
| O60664 | PLIN3   | 7478 |     |
| P84085 | ARF5    | 7452 | yes |
| P50749 | RASSF2  | 7286 |     |
| Q92574 | TSC1    | 7216 |     |
| P10588 | NR2F6   | 7208 |     |
| Q9UMN6 | KMT2B   | 7198 |     |
| Q5SU16 | TUBB    | 7178 |     |
| Q8N1F7 | NUP93   | 7162 |     |
| Q9Y2W2 | WBP11   | 7156 |     |
| Q9UJY4 | GGA2    | 7140 |     |
| Q9UQB8 | BAIAP2  | 7114 |     |
| P42680 | TEC     | 7096 |     |
| Q92597 | NDRG1   | 7090 |     |
| P55735 | SEC13   | 7068 |     |
| P09382 | LGALS1  | 7060 |     |
| O15066 | KIF3B   | 7050 |     |
| P07951 | TPM2    | 7030 |     |
| O60725 | ICMT    | 7030 |     |
| O95757 | HSPA4L  | 6974 |     |
| Q99836 | MYD88   | 6936 |     |
| Q05586 | GRIN1   | 6910 |     |
| E5KNY5 | LRPPRC  | 6886 |     |
| Q99832 | CCT7    | 6836 |     |
| P51571 | SSR4    | 6834 |     |
| Q7Z569 | BRAP    | 6742 |     |
| P50281 | MMP14   | 6728 |     |
| Q16584 | MAP3K11 | 6726 |     |
| Q9NPB6 | PARD6A  | 6694 |     |
| O00560 | SDCBP   | 6666 |     |
| Q9P107 | GMIP    | 6666 |     |
| Q9NVJ2 | ARL8B   | 6654 | yes |
| Q8IUD2 | ERC1    | 6640 |     |

Sheet1

|         |           |      |     |
|---------|-----------|------|-----|
| Q9BYG5  | PARD6B    | 6588 |     |
| Q15311  | RALBP1    | 6582 |     |
| Q96FW1  | OTUB1     | 6566 |     |
| Q6WKZ4  | RAB11FIP1 | 6520 |     |
| Q99933  | BAG1      | 6504 |     |
| Q01813  | PFKP      | 6480 |     |
| Q9UQ13  | SHOC2     | 6480 |     |
| Q8I WV7 | UBR1      | 6478 |     |
| O95793  | STAU1     | 6476 |     |
| Q9H8Y8  | GORASP2   | 6466 |     |
| Q6WCQ1  | MPRIP     | 6464 |     |
| Q99614  | TTC1      | 6426 |     |
| P18124  | RPL7      | 6426 |     |
| Q9UET6  | FTSJ1     | 6380 |     |
| Q12824  | SMARCB1   | 6378 |     |
| A7KAX9  | ARHGAP32  | 6376 |     |
| P45973  | CBX5      | 6372 |     |
| Q8WWW0  | RASSF5    | 6366 |     |
| O14965  | AURKA     | 6336 |     |
| P53365  | ARFIP2    | 6320 |     |
| Q13158  | FADD      | 6300 |     |
| Q8NC60  | NOA1      | 6274 |     |
| P81274  | GPSM2     | 6264 |     |
| P49356  | FNTB      | 6240 |     |
| P52566  | ARHGDIB   | 6234 |     |
| Q9Y6X2  | PIAS3     | 6178 |     |
| P07814  | EPRS      | 6176 |     |
| Q9UJY5  | GGA1      | 6150 |     |
| Q8TEW0  | PARD3     | 6114 |     |
| Q9NR09  | BIRC6     | 6110 |     |
| P49715  | CEBPA     | 6036 |     |
| P48507  | GCLM      | 6032 |     |
| Q15363  | TMED2     | 6016 |     |
| O00217  | NDUFS8    | 6016 |     |
| A5PKW4  | PSD       | 5956 |     |
| O43261  | DLEU1     | 5954 |     |
| P62273  | RPS29     | 5876 |     |
| Q9BU61  | NDUFAF3   | 5866 |     |
| P49755  | TMED10    | 5860 |     |
| P51531  | SMARCA2   | 5852 |     |
| P07196  | NEFL      | 5802 |     |
| Q8TDJ6  | DMXL2     | 5744 |     |
| P46459  | NSF       | 5720 |     |
| P16220  | CREB1     | 5714 |     |
| Q9BTW9  | TBCD      | 5704 |     |
| Q15642  | TRIP10    | 5688 |     |
| Q15653  | NFKBIB    | 5628 |     |
| P13569  | CFTR      | 5552 |     |
| Q9UKT9  | IKZF3     | 5522 |     |
| P84095  | RHOG      | 5520 | yes |
| Q15042  | RAB3GAP1  | 5520 |     |
| Q92734  | TFG       | 5504 |     |
| P21246  | PTN       | 5470 |     |

Sheet1

|        |          |      |     |
|--------|----------|------|-----|
| Q9UIW2 | PLXNA1   | 5368 |     |
| Q8NC51 | SERBP1   | 5364 |     |
| Q12904 | AIMP1    | 5364 |     |
| Q9BT78 | COPS4    | 5344 |     |
| Q13541 | EIF4EBP1 | 5328 |     |
| P83916 | CBX1     | 5324 |     |
| P26639 | TARS     | 5300 |     |
| O75390 | CS       | 5296 |     |
| P22695 | UQCRC2   | 5252 |     |
| Q14185 | DOCK1    | 5234 |     |
| P18085 | ARF4     | 5226 | yes |
| P49321 | NASP     | 5202 |     |
| Q13464 | ROCK1    | 5194 |     |
| O95716 | RAB3D    | 5194 | yes |
| Q5U651 | RASIP1   | 5188 |     |
| P55060 | CSE1L    | 5174 |     |
| Q9UPA5 | BSN      | 5160 |     |
| Q92888 | ARHGEF1  | 5150 |     |
| P02786 | TFRC     | 5128 |     |
| P39656 | DDOST    | 5108 |     |
| P08195 | SLC3A2   | 5098 |     |
| P43246 | MSH2     | 5090 |     |
| Q01201 | RELB     | 5066 |     |
| P50213 | IDH3A    | 5052 |     |
| Q96ST3 | SIN3A    | 5034 |     |
| Q9Y6G9 | DYNC1LI1 | 5026 |     |
| P42704 | LRPPRC   | 5000 |     |
| Q92974 | ARHGEF2  | 4984 |     |
| P13498 | CYBA     | 4936 |     |
| Q92945 | KHSRP    | 4900 |     |
| Q96AX2 | RAB37    | 4870 | yes |
| P60604 | UBE2G2   | 4864 |     |
| Q53EZ4 | CEP55    | 4796 |     |
| Q8N4C8 | MINK1    | 4794 |     |
| Q96N67 | DOCK7    | 4770 |     |
| P04899 | GNAI2    | 4752 |     |
| Q53G59 | KLHL12   | 4746 |     |
| Q92730 | RND1     | 4684 | yes |
| Q9NVI1 | FANCI    | 4672 |     |
| Q9UBU9 | NXF1     | 4640 |     |
| O00189 | AP4M1    | 4620 |     |
| Q15075 | EEA1     | 4604 |     |
| Q9NRW1 | RAB6B    | 4602 | yes |
| Q9UL26 | RAB22A   | 4580 | yes |
| O60271 | SPAG9    | 4566 |     |
| O43592 | XPOT     | 4562 |     |
| O75821 | EIF3G    | 4532 |     |
| P07384 | CAPN1    | 4532 |     |
| O15031 | PLXNB2   | 4514 |     |
| Q9UPT5 | EXOC7    | 4510 |     |
| P09661 | SNRPA1   | 4492 |     |
| Q14194 | CRMP1    | 4488 |     |
| Q9Y5K5 | UCHL5    | 4478 |     |

Sheet1

|        |           |      |     |
|--------|-----------|------|-----|
| Q12846 | STX4      | 4460 |     |
| Q09013 | DMPK      | 4454 |     |
| O95197 | RTN3      | 4426 |     |
| Q9UL19 | RARRES3   | 4422 |     |
| O43566 | RGS14     | 4412 |     |
| Q7L2J0 | MEPCE     | 4372 |     |
| Q8NDX1 | PSD4      | 4354 |     |
| P02749 | APOH      | 4350 |     |
| P56134 | ATP5J2    | 4342 |     |
| P04843 | RPN1      | 4340 |     |
| Q96HA1 | POM121    | 4330 |     |
| P42684 | ABL2      | 4314 |     |
| Q03113 | GNA12     | 4298 |     |
| Q96A65 | EXOC4     | 4296 |     |
| Q8N6T3 | ARFGAP1   | 4274 |     |
| Q86Y07 | VRK2      | 4268 |     |
| O14578 | CIT       | 4258 |     |
| Q13636 | RAB31     | 4252 | yes |
| Q14457 | BECN1     | 4228 |     |
| O60496 | DOK2      | 4196 |     |
| Q01664 | TFAP4     | 4186 |     |
| P61204 | ARF3      | 4182 | yes |
| P24386 | CHM       | 4160 |     |
| Q9UKR5 | C14orf1   | 4148 |     |
| Q86YS3 | RAB11FIP4 | 4110 |     |
| P30305 | CDC25B    | 4102 |     |
| Q9HD15 | SRA1      | 4100 |     |
| P46060 | RANGAP1   | 4084 |     |
| Q96CV9 | OPTN      | 4076 |     |
| Q04724 | TLE1      | 4068 |     |
| Q13185 | CBX3      | 4062 |     |
| P19878 | NCF2      | 4042 |     |
| Q9NYB9 | ABI2      | 4042 |     |
| Q9UPN3 | MACF1     | 4030 |     |
| P51665 | PSMD7     | 4028 |     |
| Q96T51 | RUFY1     | 4006 |     |
| P25685 | DNAJB1    | 4002 |     |
| Q8NEB9 | PIK3C3    | 3988 |     |
| P53801 | PTTG1IP   | 3982 |     |
| Q9H5N1 | RABEP2    | 3982 |     |
| Q9P212 | PLCE1     | 3964 |     |
| Q13574 | DGKZ      | 3926 |     |
| O75674 | TOM1L1    | 3880 |     |
| P32969 | RPL9      | 3852 |     |
| Q15459 | SF3A1     | 3844 |     |
| O00401 | WASL      | 3838 |     |
| Q9NYS0 | NKIRAS1   | 3828 | yes |
| Q12982 | BNIP2     | 3820 |     |
| P20749 | BCL3      | 3820 |     |
| O14617 | AP3D1     | 3800 |     |
| O00203 | AP3B1     | 3762 |     |
| Q12809 | KCNH2     | 3758 |     |
| Q8N8R7 | ARL14EP   | 3746 |     |

Sheet1

|        |          |      |     |
|--------|----------|------|-----|
| P29323 | EPHB2    | 3726 |     |
| Q8TB24 | RIN3     | 3712 |     |
| Q9UBF2 | COPG2    | 3712 |     |
| O43543 | XRCC2    | 3700 |     |
| O60610 | DIAPH1   | 3690 |     |
| Q9UNA1 | ARHGAP26 | 3686 |     |
| P51813 | BMX      | 3680 |     |
| P11177 | PDHB     | 3676 |     |
| Q15019 | SEPT2    | 3670 |     |
| Q9Y2A7 | NCKAP1   | 3664 |     |
| Q9NP72 | RAB18    | 3662 | yes |
| Q86UP2 | KTN1     | 3662 |     |
| P30419 | NMT1     | 3642 |     |
| P78357 | CNTNAP1  | 3628 |     |
| Q16623 | STX1A    | 3622 |     |
| Q9H8V3 | ECT2     | 3598 |     |
| Q02779 | MAP3K10  | 3590 |     |
| P04839 | CYBB     | 3590 |     |
| O15056 | SYNJ2    | 3568 |     |
| Q92973 | TNPO1    | 3556 |     |
| Q96BK5 | PINX1    | 3544 |     |
| O75369 | FLNB     | 3544 |     |
| P18887 | XRCC1    | 3540 |     |
| P54577 | YARS     | 3528 |     |
| O75914 | PAK3     | 3528 |     |
| O00410 | IPO5     | 3528 |     |
| P52198 | RND2     | 3494 | yes |
| Q9UHV9 | PFDN2    | 3480 |     |
| P53367 | ARFIP1   | 3476 |     |
| Q9H0S4 | DDX47    | 3432 |     |
| P33316 | DUT      | 3426 |     |
| Q9UI26 | IPO11    | 3422 |     |
| P83876 | TXNL4A   | 3420 |     |
| P28799 | GRN      | 3412 |     |
| Q9NYR9 | NKIRAS2  | 3404 | yes |
| Q9UN37 | VPS4A    | 3400 |     |
| Q9UM73 | ALK      | 3364 |     |
| Q9Y613 | FHOD1    | 3356 |     |
| Q8TDZ2 | MICAL1   | 3342 |     |
| Q9BZ29 | DOCK9    | 3322 |     |
| Q9GZM8 | NDEL1    | 3314 |     |
| P35268 | RPL22    | 3294 |     |
| O75962 | TRIO     | 3292 |     |
| P37837 | TALDO1   | 3278 |     |
| O96013 | PAK4     | 3264 |     |
| Q8NF50 | DOCK8    | 3224 |     |
| P10911 | MCF2     | 3218 |     |
| O14579 | COPE     | 3182 |     |
| P62829 | RPL23    | 3166 |     |
| O95273 | CCNDBP1  | 3162 |     |
| P19022 | CDH2     | 3142 |     |
| Q70J99 | UNC13D   | 3140 |     |
| Q00587 | CDC42EP1 | 3092 |     |

Sheet1

|        |           |      |     |
|--------|-----------|------|-----|
| P61970 | NUTF2     | 3088 |     |
| Q02535 | ID3       | 3086 |     |
| Q16555 | DPYSL2    | 3082 |     |
| Q9UI30 | TRMT112   | 3072 |     |
| Q13972 | RASGRF1   | 3060 |     |
| Q9BQ95 | ECSIT     | 3054 |     |
| Q86Y56 | HEATR2    | 3048 |     |
| P30533 | LRPAP1    | 3026 |     |
| Q9NZQ3 | NCKIPSD   | 3022 |     |
| Q96A33 | CCDC47    | 3022 |     |
| Q96S59 | RANBP9    | 2984 |     |
| P62380 | TBPL1     | 2976 |     |
| O15068 | MCF2L     | 2962 |     |
| P01241 | GH1       | 2954 |     |
| Q9BXF6 | RAB11FIP5 | 2944 |     |
| P43354 | NR4A2     | 2922 |     |
| Q9H3Q1 | CDC42EP4  | 2922 |     |
| Q10567 | AP1B1     | 2906 |     |
| P48039 | MTNR1A    | 2874 |     |
| O00499 | BIN1      | 2862 |     |
| P62917 | RPL8      | 2858 |     |
| Q9UHY1 | NRBP1     | 2842 |     |
| P24390 | KDELR1    | 2842 |     |
| NA     | PIP3      | 2834 |     |
| O14653 | GOSR2     | 2822 |     |
| O14640 | DVL1      | 2806 |     |
| Q9Y4L1 | HYOU1     | 2804 |     |
| Q9Y4D1 | DAAM1     | 2792 |     |
| Q9UL25 | RAB21     | 2788 | yes |
| Q99541 | PLIN2     | 2788 |     |
| Q96JA3 | PLEKHA8   | 2788 |     |
| O60763 | USO1      | 2778 |     |
| O75628 | REM1      | 2752 | yes |
| Q9Y5S2 | CDC42BPB  | 2748 |     |
| Q9Y6W5 | WASF2     | 2718 |     |
| P37108 | SRP14     | 2700 |     |
| O75116 | ROCK2     | 2680 |     |
| P61966 | AP1S1     | 2676 |     |
| P04275 | VWF       | 2662 |     |
| Q02241 | KIF23     | 2650 |     |
| P48556 | PSMD8     | 2648 |     |
| Q9UGI8 | TES       | 2646 |     |
| P53609 | PGGT1B    | 2636 |     |
| Q9Y3C7 | MED31     | 2622 |     |
| Q99755 | PIP5K1A   | 2556 |     |
| P35228 | NOS2      | 2554 |     |
| P60866 | RPS20     | 2550 |     |
| Q9C0E2 | XPO4      | 2548 |     |
| Q9Y2D8 | SSX2IP    | 2530 |     |
| Q9Y4G8 | RAPGEF2   | 2528 |     |
| Q13576 | IQGAP2    | 2512 |     |
| Q8WU20 | FRS2      | 2462 |     |
| Q96KP1 | EXOC2     | 2454 |     |

Sheet1

|        |          |      |     |
|--------|----------|------|-----|
| P14672 | SLC2A4   | 2446 |     |
| Q13905 | RAPGEF1  | 2446 |     |
| Q9UPT6 | MAPK8IP3 | 2444 |     |
| O15265 | ATXN7    | 2436 |     |
| P48736 | PIK3CG   | 2426 |     |
| Q0VDD7 | C19orf57 | 2412 |     |
| O60603 | TLR2     | 2400 |     |
| Q9GZT9 | EGLN1    | 2396 |     |
| Q12802 | AKAP13   | 2380 |     |
| O75489 | NDUFS3   | 2374 |     |
| P04004 | VTN      | 2368 |     |
| Q8NFH8 | REPS2    | 2362 |     |
| O60318 | MCM3AP   | 2346 |     |
| Q9NR96 | TLR9     | 2332 |     |
| Q9H082 | RAB33B   | 2322 | yes |
| Q9NPF4 | OSGEP    | 2306 |     |
| O43837 | IDH3B    | 2302 |     |
| Q8IXJ6 | SIRT2    | 2290 |     |
| Q9BQ39 | DDX50    | 2274 |     |
| O94829 | IPO13    | 2256 |     |
| Q9BV68 | RNF126   | 2254 |     |
| P13804 | ETFA     | 2246 |     |
| Q9Y5J5 | PHLDA3   | 2234 |     |
| Q14451 | GRB7     | 2200 |     |
| P23258 | TUBG1    | 2196 |     |
| Q7L576 | CYFIP1   | 2188 |     |
| Q9BUV8 | C20orf24 | 2186 |     |
| Q5VYK3 | ECM29    | 2182 |     |
| Q16512 | PKN1     | 2174 |     |
| Q9Y3L3 | SH3BP1   | 2170 |     |
| Q96D21 | RASD2    | 2166 | yes |
| O60383 | GDF9     | 2124 |     |
| Q6UVK1 | CSPG4    | 2122 |     |
| P08473 | MME      | 2118 |     |
| Q5T5U3 | ARHGAP21 | 2114 |     |
| Q92608 | DOCK2    | 2106 |     |
| Q08945 | SSRP1    | 2102 |     |
| Q9BRK5 | SDF4     | 2096 |     |
| Q8NFF5 | FLAD1    | 2088 |     |
| Q9UJM3 | ERRF11   | 2088 |     |
| Q7Z6B7 | SRGAP1   | 2082 |     |
| P13861 | PRKAR2A  | 2070 |     |
| O00458 | IFRD1    | 2064 |     |
| Q9H0A6 | RNF32    | 2052 |     |
| O60229 | KALRN    | 2048 |     |
| P29372 | MPG      | 2032 |     |
| Q9H4E5 | RHOJ     | 2020 | yes |
| Q96JB5 | CDK5RAP3 | 2008 |     |
| O94941 | UBOX5    | 2006 |     |
| Q9UHD8 | SEPT9    | 2002 |     |
| P49789 | FHIT     | 1980 |     |
| P57729 | RAB38    | 1966 | yes |
| Q99819 | ARHGDIG  | 1964 |     |



Sheet1

|        |           |      |     |
|--------|-----------|------|-----|
| O00629 | KPNA4     | 1956 |     |
| Q00341 | HDLBP     | 1956 |     |
| Q7LDG7 | RASGRP2   | 1954 |     |
| Q8TD19 | NEK9      | 1944 |     |
| Q96D71 | REPS1     | 1932 |     |
| P35125 | USP6      | 1922 |     |
| Q13829 | TNFAIP1   | 1920 |     |
| O00194 | RAB27B    | 1920 | yes |
| P78347 | GTF2I     | 1920 |     |
| P02686 | MBP       | 1914 |     |
| Q12772 | SREBF2    | 1884 |     |
| Q12815 | TROAP     | 1878 |     |
| P06454 | PTMA      | 1874 |     |
| Q9UNN5 | FAF1      | 1874 |     |
| Q16644 | MAPKAPK3  | 1866 |     |
| Q96CN9 | GCC1      | 1852 |     |
| P04632 | CAPNS1    | 1844 |     |
| Q13064 | MKRN3     | 1836 |     |
| Q9UNT1 | RABL2B    | 1820 | yes |
| O95347 | SMC2      | 1816 |     |
| Q9NQU5 | PAK6      | 1804 |     |
| Q9UK45 | LSM7      | 1792 |     |
| P15170 | GSPT1     | 1780 |     |
| Q68EM7 | ARHGAP17  | 1774 |     |
| Q9BQ83 | SLX1A     | 1758 |     |
| O60879 | DIAPH2    | 1752 |     |
| P05060 | CHGB      | 1752 |     |
| O43665 | RGS10     | 1744 |     |
| Q8NF91 | SYNE1     | 1728 |     |
| Q00722 | PLCB2     | 1728 |     |
| P22460 | KCNA5     | 1724 |     |
| P20823 | HNF1A     | 1724 |     |
| Q14134 | TRIM29    | 1682 |     |
| Q96BY6 | DOCK10    | 1662 |     |
| Q5RL73 | RBM48     | 1642 |     |
| P30154 | PPP2R1B   | 1638 |     |
| Q9H1Y0 | ATG5      | 1634 |     |
| Q9UNA4 | POLI      | 1626 |     |
| Q13439 | GOLGA4    | 1624 |     |
| Q13322 | GRB10     | 1622 |     |
| Q15669 | RHOH      | 1614 | yes |
| P01375 | TNF       | 1604 |     |
| Q8WUD1 | RAB2B     | 1582 | yes |
| O95373 | IPO7      | 1582 |     |
| O60260 | PARK2     | 1570 |     |
| P61158 | ACTR3     | 1554 |     |
| O94925 | GLS       | 1534 |     |
| O95819 | MAP4K4    | 1532 |     |
| Q15257 | PPP2R4    | 1504 |     |
| P31751 | AKT2      | 1494 |     |
| Q9BYG4 | PARD6G    | 1488 |     |
| Q7L804 | RAB11FIP2 | 1476 |     |
| Q04637 | EIF4G1    | 1474 |     |

Sheet1

|        |           |      |     |
|--------|-----------|------|-----|
| Q13148 | TARDBP    | 1466 |     |
| Q96IZ7 | RSRC1     | 1458 |     |
| Q9Y3E7 | CHMP3     | 1450 |     |
| Q8N3R9 | MPP5      | 1440 |     |
| Q15041 | ARL6IP1   | 1438 |     |
| O75044 | SRGAP2    | 1434 |     |
| Q9UIA9 | XPO7      | 1426 |     |
| Q8N5V2 | NGEF      | 1426 |     |
| P20290 | BTF3      | 1412 |     |
| P52209 | PGD       | 1408 |     |
| Q07890 | SOS2      | 1398 |     |
| Q13535 | ATR       | 1398 |     |
| P30556 | AGTR1     | 1386 |     |
| Q9Y4I1 | MYO5A     | 1384 |     |
| O60331 | PIP5K1C   | 1364 |     |
| Q96QF0 | RAB3IP    | 1348 |     |
| O43175 | PHGDH     | 1348 |     |
| P30626 | SRI       | 1346 |     |
| Q5JR01 | EEF1A1    | 1338 |     |
| Q99828 | CIB1      | 1338 |     |
| P18669 | PGAM1     | 1322 |     |
| Q9H7P9 | PLEKHG2   | 1318 |     |
| Q9BWH2 | FUNDC2    | 1292 |     |
| O95714 | HERC2     | 1286 |     |
| P57721 | PCBP3     | 1270 |     |
| O75154 | RAB11FIP3 | 1268 |     |
| Q9BST9 | RTKN      | 1254 |     |
| O43559 | FRS3      | 1246 |     |
| P05814 | CSN2      | 1246 |     |
| P20309 | CHRM3     | 1234 |     |
| P15531 | NME1      | 1216 |     |
| O43747 | AP1G1     | 1196 |     |
| O60684 | KPNA6     | 1180 |     |
| P13591 | NCAM1     | 1174 |     |
| Q9H4E7 | DEF6      | 1160 |     |
| O60880 | SH2D1A    | 1156 |     |
| O14974 | PPP1R12A  | 1154 |     |
| P16035 | TIMP2     | 1146 |     |
| Q14232 | EIF2B1    | 1142 |     |
| P15822 | HIVEP1    | 1126 |     |
| P02765 | AHSG      | 1124 |     |
| Q8NHS7 | PTPRS     | 1114 |     |
| Q6UB99 | ANKRD11   | 1114 |     |
| P00747 | PLG       | 1100 |     |
| Q9BPW5 | RASL11B   | 1096 | yes |
| Q4V328 | GRIPAP1   | 1094 |     |
| Q8IZP1 | TBC1D3    | 1082 |     |
| Q8NFW9 | MYRIP     | 1078 |     |
| Q8WZA2 | RAPGEF4   | 1066 |     |
| P48995 | TRPC1     | 1062 |     |
| P67812 | SEC11A    | 1058 |     |
| Q7L014 | DDX46     | 1058 |     |
| P36404 | ARL2      | 1054 | yes |

Sheet1

|        |          |      |     |
|--------|----------|------|-----|
| P10144 | GZMB     | 1042 |     |
| Q5T0N5 | FNBP1L   | 1042 |     |
| Q8IYU2 | HACE1    | 1030 |     |
| Q14241 | TCEB3    | 1024 |     |
| O43818 | RRP9     | 1022 |     |
| P21359 | NF1      | 1022 |     |
| P30622 | CLIP1    | 1022 |     |
| P51955 | NEK2     | 1000 |     |
| Q9H1K0 | ZFYVE20  | 994  |     |
| Q8WUW1 | BRK1     | 990  |     |
| O95835 | LATS1    | 984  |     |
| P82094 | TMF1     | 968  |     |
| Q86UR1 | NOXA1    | 964  |     |
| Q9HCH5 | SYTL2    | 942  |     |
| P04181 | OAT      | 942  |     |
| Q9UM54 | MYO6     | 930  |     |
| Q8WYP3 | RIN2     | 926  |     |
| A1A4S6 | ARHGAP10 | 906  |     |
| Q9Y2B9 | PKIG     | 904  |     |
| Q9BY41 | HDAC8    | 900  |     |
| Q9HD26 | GOPC     | 900  |     |
| O95551 | TDP2     | 890  |     |
| O00442 | RTCA     | 888  |     |
| Q16625 | OCLN     | 888  |     |
| Q14643 | ITPR1    | 888  |     |
| O60890 | OPHN1    | 876  |     |
| Q86VW2 | ARHGEF25 | 876  |     |
| P53396 | ACLY     | 870  |     |
| Q9UHV2 | SERTAD1  | 860  |     |
| Q6FHU2 | PGAM1    | 834  |     |
| Q9Y272 | RASD1    | 818  | yes |
| P30793 | GCH1     | 794  |     |
| Q9NPH3 | IL1RAP   | 780  |     |
| Q9BZY9 | TRIM31   | 770  |     |
| Q96QZ7 | MAG11    | 758  |     |
| Q75N03 | CBLL1    | 756  |     |
| P63162 | SNRPN    | 742  |     |
| Q8WXI2 | CNKSR2   | 710  |     |
| O14730 | RIOK3    | 708  |     |
| Q9P0T4 | ZNF581   | 708  |     |
| Q52LW3 | ARHGAP29 | 700  |     |
| P15882 | CHN1     | 694  |     |
| Q2M1Z3 | ARHGAP31 | 694  |     |
| Q15637 | SF1      | 686  |     |
| Q9BWA2 | EWSR1    | 680  |     |
| Q9H4K1 | RIBC2    | 672  |     |
| O95865 | DDAH2    | 672  |     |
| Q9GZT6 | CCDC90B  | 668  |     |
| O60477 | DBC1     | 658  |     |
| P07197 | NEFM     | 648  |     |
| O00305 | CACNB4   | 648  |     |
| P26374 | CHML     | 646  |     |
| P13497 | BMP1     | 644  |     |

Sheet1

|        |          |     |     |
|--------|----------|-----|-----|
| P01127 | PDGFB    | 638 |     |
| P21731 | TBXA2R   | 630 |     |
| Q9HAW0 | BRF2     | 624 |     |
| Q8N2S1 | LTBP4    | 594 |     |
| Q5HYK7 | SH3D19   | 592 |     |
| Q13017 | ARHGAP5  | 590 |     |
| Q9UPM8 | AP4E1    | 580 |     |
| O60784 | TOM1     | 556 |     |
| Q5JSH3 | WDR44    | 556 |     |
| P31153 | MAT2A    | 556 |     |
| Q8N2Y8 | RUSC2    | 554 |     |
| Q7Z465 | BNIPL    | 548 |     |
| Q12829 | RAB40B   | 546 | yes |
| Q9P035 | PTPLAD1  | 540 |     |
| Q969K3 | RNF34    | 538 |     |
| P16452 | EPB42    | 534 |     |
| P35555 | FBN1     | 528 |     |
| Q96C24 | SYTL4    | 522 |     |
| Q9BYV6 | TRIM55   | 520 |     |
| Q8IW93 | ARHGEF19 | 520 |     |
| B2RTY4 | MYO9A    | 514 |     |
| P14314 | PRKCSH   | 504 |     |
| Q8TEU7 | RAPGEF6  | 500 |     |
| Q5T124 | UBXN11   | 498 |     |
| Q01851 | POU4F1   | 496 |     |
| Q3YEC7 | RABL6    | 492 | yes |
| Q9UH99 | SUN2     | 486 |     |
| Q9HCK5 | EIF2C4   | 484 |     |
| Q9NYN1 | RASL12   | 474 | yes |
| Q9BXR0 | QTRT1    | 464 |     |
| O75832 | PSMD10   | 460 |     |
| Q86YL6 | RICS     | 458 |     |
| Q9NS91 | RAD18    | 452 |     |
| O00522 | KRIT1    | 448 |     |
| Q9Y4L5 | RNF115   | 432 |     |
| P58062 | SPINK7   | 426 |     |
| Q9Y4F9 | FAM65B   | 424 |     |
| Q9NR80 | ARHGEF4  | 418 |     |
| O43768 | ENSA     | 416 |     |
| Q8N3F8 | MICALL1  | 414 |     |
| O95267 | RASGRP1  | 396 |     |
| Q9P286 | PAK7     | 392 |     |
| Q12774 | ARHGEF5  | 392 |     |
| Q15109 | AGER     | 390 |     |
| O94827 | PLEKHG5  | 388 |     |
| Q14088 | RAB33A   | 386 | yes |
| Q8IYJ3 | SYTL1    | 384 |     |
| Q8TDW5 | SYTL5    | 376 |     |
| Q8IZJ4 | RGL4     | 374 |     |
| P50579 | METAP2   | 370 |     |
| Q8IWN7 | RP1L1    | 368 |     |
| Q9P0K1 | ADAM22   | 364 |     |
| Q6DT37 | CDC42BPG | 356 |     |

Sheet1

|        |           |     |     |
|--------|-----------|-----|-----|
| Q14449 | GRB14     | 348 |     |
| P26367 | PAX6      | 346 |     |
| Q9NP84 | TNFRSF12A | 344 |     |
| Q96G01 | BICD1     | 336 |     |
| Q7L0Q8 | RHOU      | 334 | yes |
| P31629 | HIVEP2    | 334 |     |
| P49848 | TAF6      | 330 |     |
| P16389 | KCNA2     | 328 |     |
| Q9H6R7 | C2orf44   | 328 |     |
| Q9ULV0 | MYO5B     | 326 |     |
| O15479 | MAGEB2    | 326 |     |
| Q96HU1 | SGSM3     | 324 |     |
| Q9NV70 | EXOC1     | 310 |     |
| Q8TC07 | TBC1D15   | 308 |     |
| O95704 | APBB3     | 308 |     |
| P52757 | CHN2      | 294 |     |
| P01009 | SERPINA1  | 288 |     |
| Q9HA65 | TBC1D17   | 286 |     |
| Q9P078 |           | 282 |     |
| Q9HC35 | EML4      | 280 |     |
| Q5HYC2 | KIAA2026  | 276 |     |
| C9J1V7 | AAR2      | 276 |     |
| Q7Z628 | NET1      | 274 |     |
| O00562 | PITPNM1   | 262 |     |
| Q9HC57 | WFDC1     | 262 |     |
| P28332 | ADH6      | 262 |     |
| Q8TBN0 | RAB3IL1   | 258 |     |
| P57078 | RIPK4     | 254 |     |
| Q92738 | USP6NL    | 254 |     |
| Q13459 | MYO9B     | 252 |     |
| O75367 | H2AFY     | 252 |     |
| P26885 | FKBP2     | 250 |     |
| Q9UMR2 | DDX19B    | 250 |     |
| O14787 | TNPO2     | 246 |     |
| Q7Z698 | SPRED2    | 246 |     |
| Q9Y600 | CSAD      | 236 |     |
| Q53QZ3 | ARHGAP15  | 236 |     |
| Q96NA2 | RILP      | 234 |     |
| O95466 | FMNL1     | 232 |     |
| P49366 | DHPS      | 230 |     |
| Q13951 | CBFB      | 228 |     |
| Q9BPX3 | NCAPG     | 226 |     |
| Q12851 | MAP4K2    | 226 |     |
| Q5JS13 | RALGPS1   | 224 |     |
| Q00765 | REEP5     | 222 |     |
| Q96QU8 | XPO6      | 220 |     |
| O60645 | EXOC3     | 218 |     |
| Q14820 | SF1       | 216 |     |
| Q9H3F6 | KCTD10    | 216 |     |
| Q8R2X8 | Blzf1     | 212 |     |
| Q8N4G2 | ARL14     | 212 | yes |
| Q8NHH9 | ATL2      | 204 |     |
| Q66PJ3 | ARL6IP4   | 198 |     |

Sheet1

|        |           |     |     |
|--------|-----------|-----|-----|
| Q9Y6X8 | ZHX2      | 194 |     |
| Q6ZSZ5 | ARHGEF18  | 192 |     |
| Q7Z444 | ERAS      | 190 | yes |
| P02775 | PPBP      | 188 |     |
| Q9UKX7 | NUP50     | 188 |     |
| Q8TDF6 | RASGRP4   | 186 |     |
| Q8TCX5 | RHPN1     | 184 |     |
| P00395 | MT-CO1    | 180 |     |
| Q5VVX9 | UBE2U     | 178 |     |
| P15622 | ZNF250    | 176 |     |
| Q9NRR8 | CDC42SE1  | 176 |     |
| Q9NRR3 | CDC42SE2  | 176 |     |
| Q59HE9 |           | 176 |     |
| Q9Y689 | ARL5A     | 174 | yes |
| Q9NS15 | LTBP3     | 174 |     |
| Q8NEU8 | APPL2     | 170 |     |
| Q8N122 | RPTOR     | 168 |     |
| O43324 | EEF1E1    | 168 |     |
| Q9Y675 | SNURF     | 166 |     |
| Q9NZL6 | RGL1      | 166 |     |
| Q92565 | RAPGEF5   | 164 |     |
| P16083 | NQO2      | 162 |     |
| Q59EK9 | RUNDC3A   | 160 |     |
| Q9P2R3 | ANKFY1    | 158 |     |
| P22102 | GART      | 154 |     |
| P51178 | PLCD1     | 152 |     |
| Q96E17 | RAB3C     | 148 | yes |
| Q9NRD0 | FBXO8     | 148 |     |
| O75843 | AP1G2     | 148 |     |
| Q8TEC5 | SH3RF2    | 142 |     |
| Q08289 | CACNB2    | 140 |     |
| Q9UDV6 | ZNF212    | 138 |     |
| B9EGS8 | BRAP      | 138 |     |
| Q4VX76 | SYTL3     | 136 |     |
| O95149 | SNUPN     | 134 |     |
| P52824 | DGKQ      | 134 |     |
| O95398 | RAPGEF3   | 132 |     |
| Q8NEV8 | EXPH5     | 132 |     |
| O15554 | KCNN4     | 130 |     |
| O14559 | ARHGAP33  | 130 |     |
| Q7LBR1 | CHMP1B    | 128 |     |
| Q9H6Z4 | RANBP3    | 126 |     |
| Q9UKK6 | NXT1      | 126 |     |
| O75828 | CBR3      | 126 |     |
| Q7RTN4 | RTN3      | 120 |     |
| P07195 | LDHB      | 118 |     |
| P03971 | AMH       | 118 |     |
| P98174 | FGD1      | 116 |     |
| Q8TBA6 | GOLGA5    | 114 |     |
| O14763 | TNFRSF10B | 110 |     |
| Q9BYZ6 | RHOBTB2   | 108 | yes |
| Q92556 | ELMO1     | 108 |     |
| P11712 | CYP2C9    | 108 |     |

Sheet1

|        |              |     |     |
|--------|--------------|-----|-----|
| Q6ZUM4 | ARHGAP27     | 108 |     |
| Q9NR81 | ARHGEF3      | 106 |     |
| Q9NTK1 | DEPP         | 104 |     |
| P23368 | ME2          | 104 |     |
| Q8N766 | EMC1         | 104 |     |
| Q96F81 | DISP1        | 102 |     |
| Q9H993 | C6orf211     | 100 |     |
| Q92871 | PMM1         | 92  |     |
| Q9UIL1 | SCOC         | 92  |     |
| P48426 | PIP4K2A      | 88  |     |
| Q6P3S6 | FBXO42       | 88  |     |
| Q99932 | SPAG8        | 82  |     |
| Q13368 | MPP3         | 82  |     |
| Q6VN20 | RANBP10      | 80  |     |
| Q92633 | LPAR1        | 80  |     |
| Q8TD16 | BICD2        | 80  |     |
| Q14644 | RASA3        | 78  |     |
| Q99805 | TM9SF2       | 76  |     |
| P58557 | YBEY         | 74  |     |
| Q53G35 |              | 74  |     |
| Q5VT25 | CDC42BPA     | 66  |     |
| Q99986 | VRK1         | 64  |     |
| Q59ED0 |              | 64  |     |
| Q9UKI2 | CDC42EP3     | 62  |     |
| O43889 | CREB3        | 62  |     |
| O14613 | CDC42EP2     | 62  |     |
| Q8K3H0 | App1         | 62  |     |
| Q9H2G9 | BLZF1        | 58  |     |
| P60468 | SEC61B       | 56  |     |
| Q96HE3 | EML4 protein | 54  |     |
| Q9Y574 | ASB4         | 54  |     |
| P85298 | ARHGAP8      | 54  |     |
| Q8IV63 | VRK3         | 48  |     |
| P08700 | IL3          | 48  |     |
| O60831 | PRAF2        | 46  |     |
| Q96S79 | RASL10B      | 44  | yes |
| Q9NWW8 | BABAM1       | 44  |     |
| Q13427 | PPIG         | 42  |     |
| Q96IZ5 | RBM41        | 42  |     |
| O95235 | KIF20A       | 40  |     |
| Q9ULL4 | PLXNB3       | 38  |     |
| Q96IZ0 | PAWR         | 38  |     |
| Q9Y312 | AAR2         | 38  |     |
| Q14651 | PLS1         | 38  |     |
| P50222 | MEOX2        | 38  |     |
| P56470 | LGALS4       | 38  |     |
| Q9Y330 | ZBTB12       | 36  |     |
| Q13795 | ARFRP1       | 36  | yes |
| Q8WZ55 | BSND         | 34  |     |
| Q7Z5R6 | APBB1IP      | 34  |     |
| Q9Y4W6 | AFG3L2       | 32  |     |
| Q86TW2 | ADCK1        | 32  |     |
| P98171 | ARHGAP4      | 30  |     |

Sheet1

|        |           |    |     |
|--------|-----------|----|-----|
| Q92805 | GOLGA1    | 30 |     |
| Q8IWJ2 | GCC2      | 30 |     |
| O95897 | OLFM2     | 28 |     |
| Q96HD9 | ACY3      | 26 |     |
| P59190 | RAB15     | 24 | yes |
| O75915 | ARL6IP5   | 24 |     |
| Q15771 | RAB30     | 22 | yes |
| P01833 | PIGR      | 22 |     |
| Q9HD47 | RANGRF    | 22 |     |
| Q969Q5 | RAB24     | 22 | yes |
| Q7Z6U2 | TBPL1     | 18 |     |
| P16989 | CSDA      | 18 |     |
| Q3MII6 | TBC1D25   | 16 |     |
| Q96DA2 | RAB39B    | 14 | yes |
| Q96LK0 | CEP19     | 14 |     |
| O00478 | BTN3A3    | 14 |     |
| Q6Q788 | APOA5     | 12 |     |
| Q9P013 | CWC15     | 10 |     |
| Q6XUX3 | DSTYK     | 8  |     |
| Q9NR31 | SAR1A     | 6  | yes |
| O94844 | RHOBTB1   | 4  | yes |
| P59780 | AP3S2     | 2  |     |
| O00488 | ZNF593    | 0  |     |
| Q14588 | ZNF234    | 0  |     |
| Q5T4F4 | ZFYVE27   | 0  |     |
| Q9NRW7 | VPS45     | 0  |     |
| B1GXI8 | UNKL      | 0  |     |
| O14835 | TXNL4A    | 0  |     |
| Q969M1 | TOMM40L   | 0  |     |
| O14798 | TNFRSF10C | 0  |     |
| Q96A57 | TMEM230   | 0  |     |
| O76062 | TM7SF2    | 0  |     |
| O00445 | SYT5      | 0  |     |
| O95907 | SLC16A8   | 0  |     |
| Q9H446 | RWDD1     | 0  |     |
| O75695 | RP2       | 0  |     |
| Q99666 | RGPD5     | 0  |     |
| Q969G6 | RFK       | 0  |     |
| Q8IYK8 | REM2      | 0  | yes |
| Q7Z6M1 | RABEPK    | 0  |     |
| O14966 | RAB7L1    | 0  | yes |
| P61018 | RAB4B     | 0  | yes |
| Q14964 | RAB39A    | 0  | yes |
| O95755 | RAB36     | 0  | yes |
| Q9ULZ3 | PYCARD    | 0  |     |
| Q15673 | PSD       | 0  |     |
| Q8IWE5 | PLEKHM2   | 0  |     |
| O17874 | O17874    | 0  |     |
| Q9Y5V0 | ZNF706    | 0  |     |
| Q9Y473 | ZNF175    | 0  |     |
| Q9Y3L5 | RAP2C     | 0  | yes |
| Q9Y2D4 | EXOC6B    | 0  |     |
| Q9UPY8 | MAPRE3    | 0  |     |



Sheet1

|        |                         |   |     |
|--------|-------------------------|---|-----|
| Q9UP83 | COG5                    | 0 |     |
| Q9ULC3 | RAB23                   | 0 | yes |
| Q9UKN1 | MUC12                   | 0 |     |
| Q9UHY7 | ENOPH1                  | 0 |     |
| Q9UG59 | DKFZp564M2422           | 0 |     |
| Q9UBK7 | RABL2A                  | 0 | yes |
| Q9P0J6 | MRPL36                  | 0 |     |
| Q9NX57 | RAB20                   | 0 | yes |
| Q9NUZ0 | IDH3B                   | 0 |     |
| Q9NQG7 | HPS4                    | 0 |     |
| Q9NP90 | RAB9B                   | 0 | yes |
| Q9HC74 | SEPT9                   | 0 |     |
| Q9HBH0 | RHOF                    | 0 | yes |
| Q9HAM2 | SH3RF1                  | 0 |     |
| Q9H9P5 | UNKL                    | 0 |     |
| Q9H7X7 | RABL5                   | 0 | yes |
| Q9H3U5 | MFSD1                   | 0 |     |
| Q96PY5 | FMNL2                   | 0 |     |
| Q96NB3 | ZNF830                  | 0 |     |
| Q96L33 | RHOV                    | 0 | yes |
| Q96KC2 | ARL5B                   | 0 | yes |
| Q96JJ3 | ELMO2                   | 0 |     |
| Q96HU8 | DIRAS2                  | 0 | yes |
| Q96G28 | CCDC104                 | 0 |     |
| Q96CN4 | EVI5L                   | 0 |     |
| Q96BM9 | ARL8A                   | 0 | yes |
| Q96AH8 | RAB7B                   | 0 | yes |
| Q96A25 | TMEM106A                | 0 |     |
| Q969V3 | NCLN                    | 0 |     |
| Q969Q4 | ARL11                   | 0 | yes |
| Q92928 | RAB1C                   | 0 | yes |
| Q92696 | RABGGTA                 | 0 |     |
| Q92544 | TM9SF4                  | 0 |     |
| Q8WXH6 | RAB40A                  | 0 | yes |
| Q8TEJ3 | SH3RF3                  | 0 |     |
| Q8N972 | ZNF709                  | 0 |     |
| Q8N959 | cDNA FLJ38330 fis, clon | 0 |     |
| Q8N8L6 | ARL10                   | 0 | yes |
| Q8N465 | D2HGDH                  | 0 |     |
| Q8N129 | CNPY4                   | 0 |     |
| Q8IZ81 | ELMOD2                  | 0 |     |
| Q86YS6 | RAB43                   | 0 | yes |
| Q6X4W1 | NSMF                    | 0 |     |
| Q6PAL8 | Dennd5a                 | 0 |     |
| Q6IQ22 | RAB12                   | 0 | yes |
| Q6IPX1 | TBC1D3C                 | 0 |     |
| Q6AI59 | DKFZp781H0795           | 0 |     |
| Q60I27 | ALS2CL                  | 0 |     |
| Q5TBH8 | GNPAT                   | 0 |     |
| Q5HYI8 | RABL3                   | 0 | yes |
| Q3SXY8 | ARL13B                  | 0 | yes |
| Q3MIX3 | ADCK5                   | 0 |     |
| Q13637 | RAB32                   | 0 | yes |

Sheet1

|        |               |   |     |
|--------|---------------|---|-----|
| Q0VGK0 | Gabarapl1     | 0 |     |
| Q0P5N6 | ARL16         | 0 | yes |
| Q03386 | Ralgds        | 0 |     |
| P56746 | CLDN15        | 0 |     |
| P51157 | RAB28         | 0 | yes |
| A8MTZ0 | BBIP1         | 0 |     |
| A6NIZ1 | RP1BL         | 0 | yes |
| A0S183 | COX1          | 0 |     |
| A0N4V7 | Tcr-alpha hCG | 0 |     |
| O75052 | NOS1AP        | 0 |     |
| Q8IVL1 | NAV2          | 0 |     |
| P00414 | MT-CO3        | 0 |     |
| Q13421 | MSLN          | 0 |     |
| Q6ZW33 | MICALCL       | 0 |     |
| Q7RTP6 | MICAL3        | 0 |     |
| Q9Y664 | KPTN          | 0 |     |
| Q14623 | IHH           | 0 |     |
| Q9BW83 | IFT27         | 0 | yes |
| P15260 | IFNGR1        | 0 |     |
| Q01629 | IFITM2        | 0 |     |
| P08908 | HTR1A         | 0 |     |
| O15228 | GNPAT         | 0 |     |
| Q9BT04 | FUZ           | 0 |     |
| Q96IH1 | FSCN1         | 0 |     |
| P42685 | FRK           | 0 |     |
| Q8NEG0 | FAM71C        | 0 |     |
| O95661 | DIRAS3        | 0 | yes |
| O95057 | DIRAS1        | 0 | yes |
| P15169 | CPN1          | 0 |     |
| Q96FZ7 | CHMP6         | 0 |     |
| Q92496 | CFHR4         | 0 |     |
| Q6NZY7 | CDC42EP5      | 0 |     |
| Q6ZP82 | CCDC141       | 0 |     |
| O60512 | B4GALT3       | 0 |     |
| P21283 | ATP6V1C1      | 0 |     |
| P27449 | ATP6V0C       | 0 |     |
| Q8TDY4 | ASAP3         | 0 |     |
| Q8N6S5 | ARL6IP6       | 0 |     |
| P56559 | ARL4C         | 0 | yes |
| P40617 | ARL4A         | 0 | yes |
| Q17R89 | ARHGAP44      | 0 |     |
